# Supplementary material for: Mammalian Melatonin Agonist Pharmaceuticals Stimulate Rhomboid Proteins in Plants
Source: MDPI journal article supplement (doi:10.3390/biom12070882), 2022-06-24
Supplement: s1 [file s1]

# Supplementary Materials

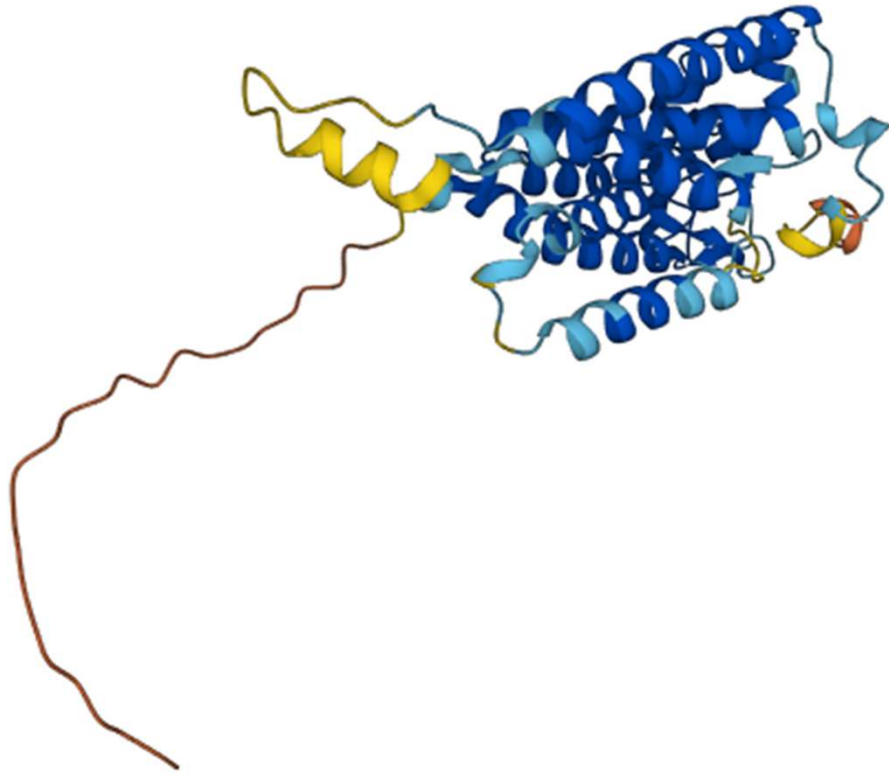

Figure S1: Predicted protein structure of rhomboid-like protein 7 from the AlphaFold Protein Structure Database, Uniprot accession O82756.

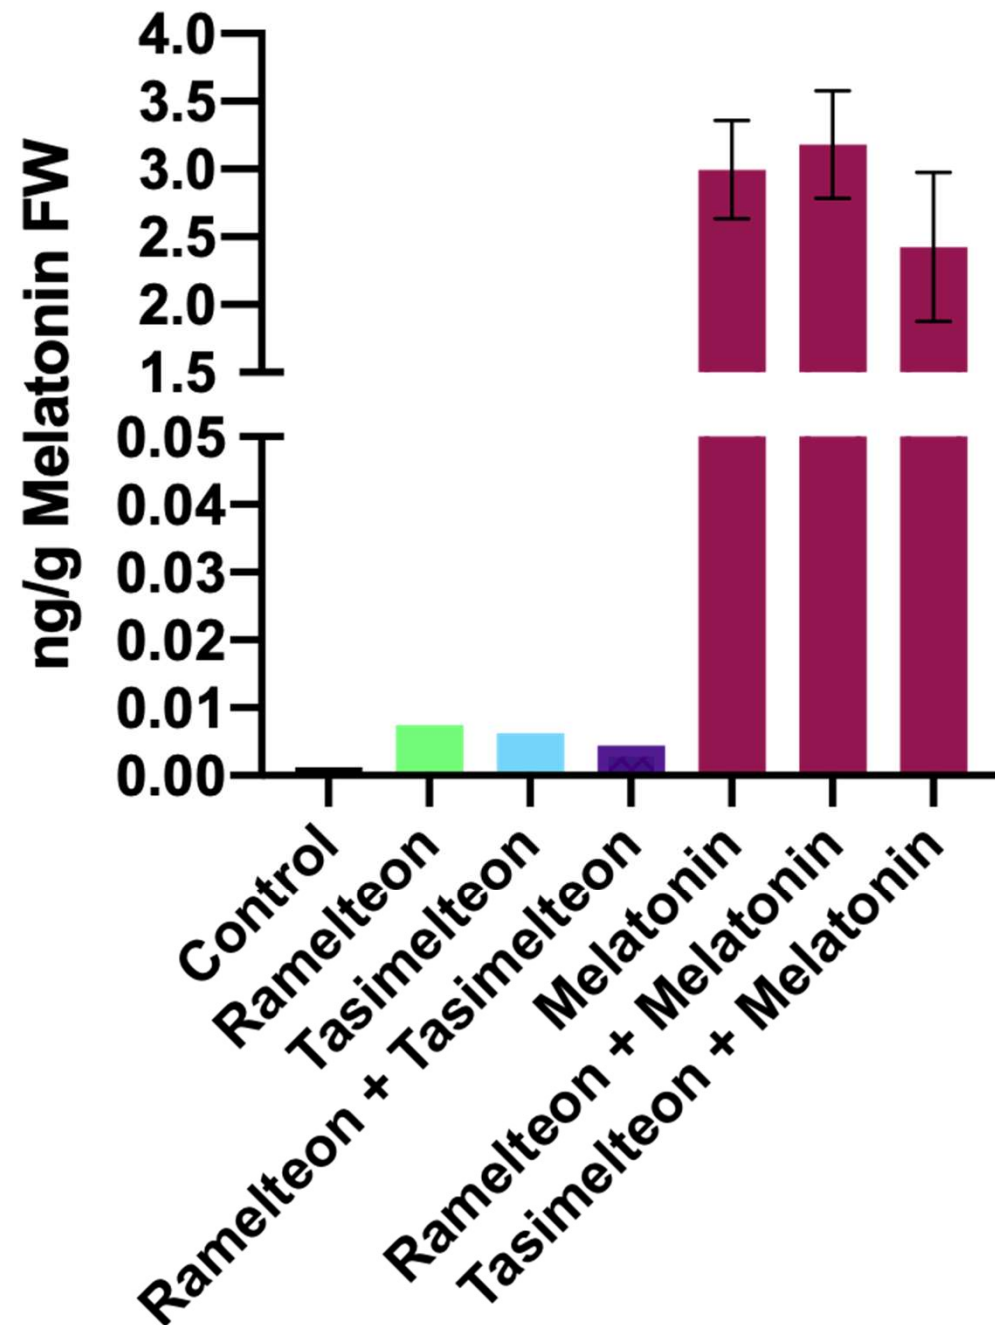

Figure S2: Melatonin content in *Arabidopsis thaliana* Col-0 tissues treated with 10 M ramelteon, 10 M tasimelteon, or 100 M melatonin. Data are displayed as mean; error bars extend to the range of standard error.

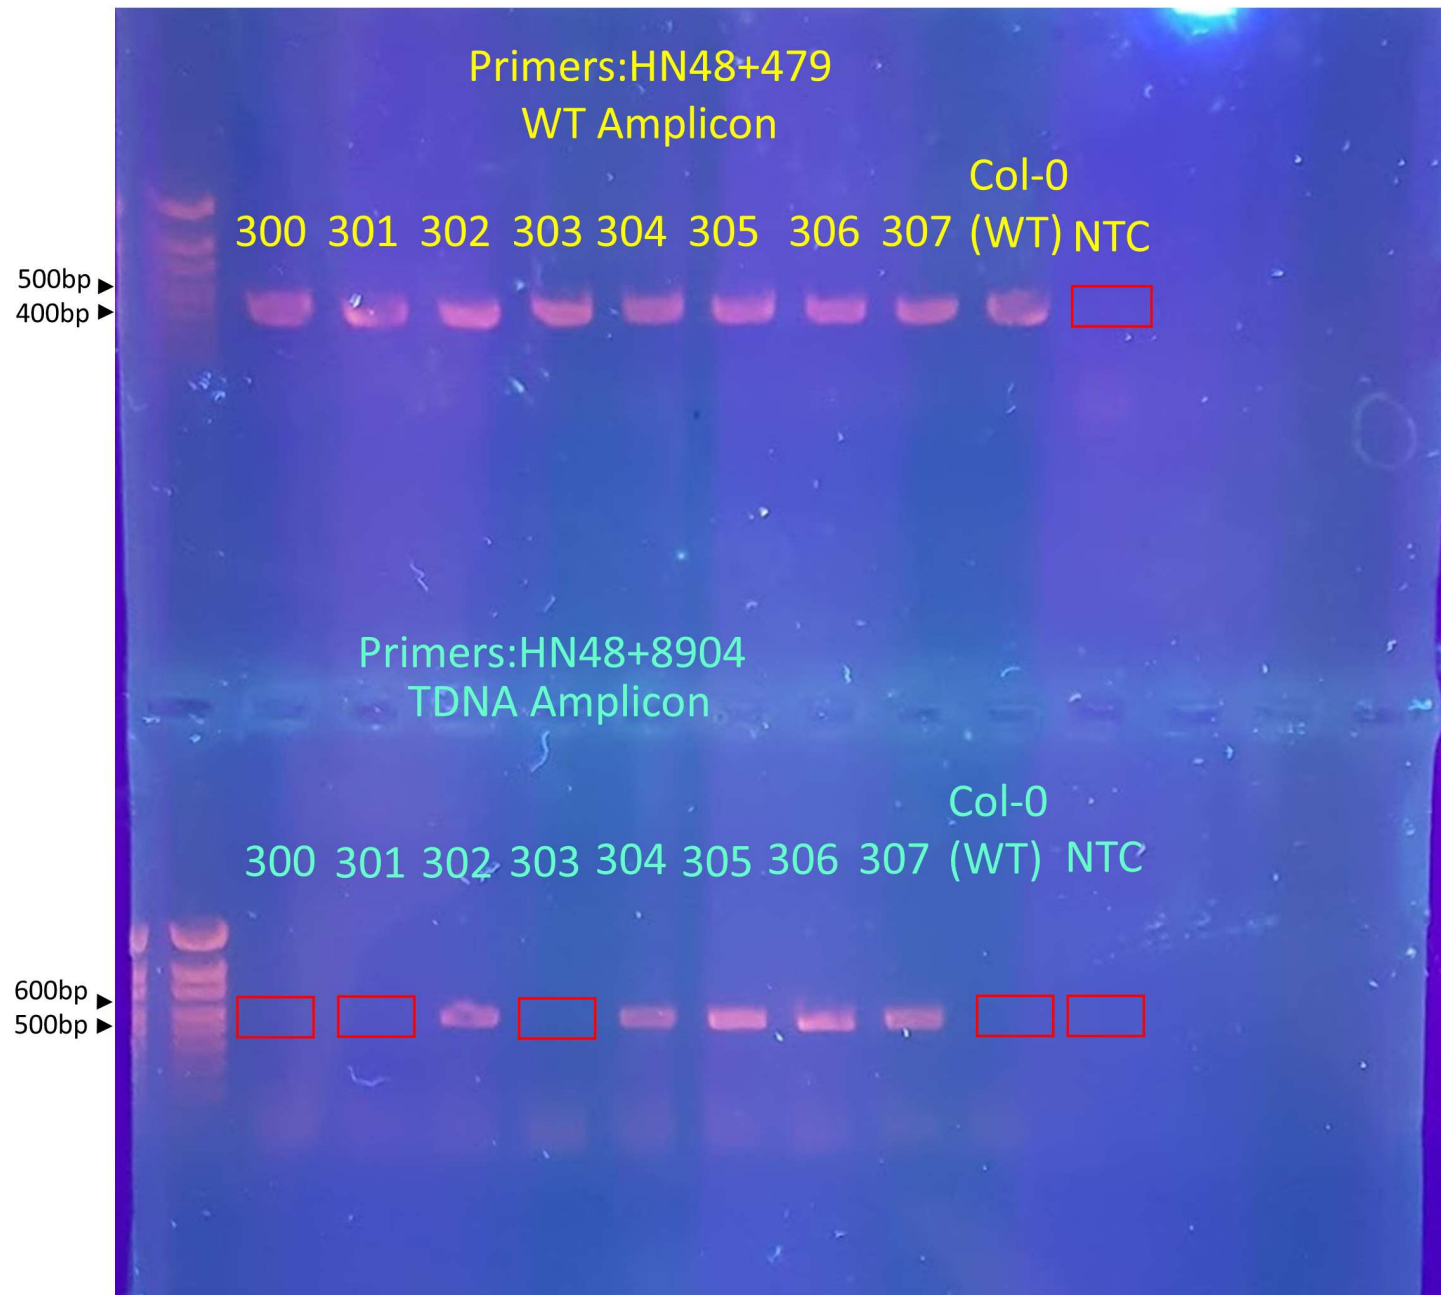

Figure S3: Gel images of GABI-Kat confirmation strategy for presence of T-DNA insertion in RBL7 gene in Arabidopsis lines used in this study

| Primer Pair      | Amplicon Size (bp) |
|------------------|--------------------|
| WT (HN48+479)    | 479                |
| TDNA (HN48+8409) | 504                |

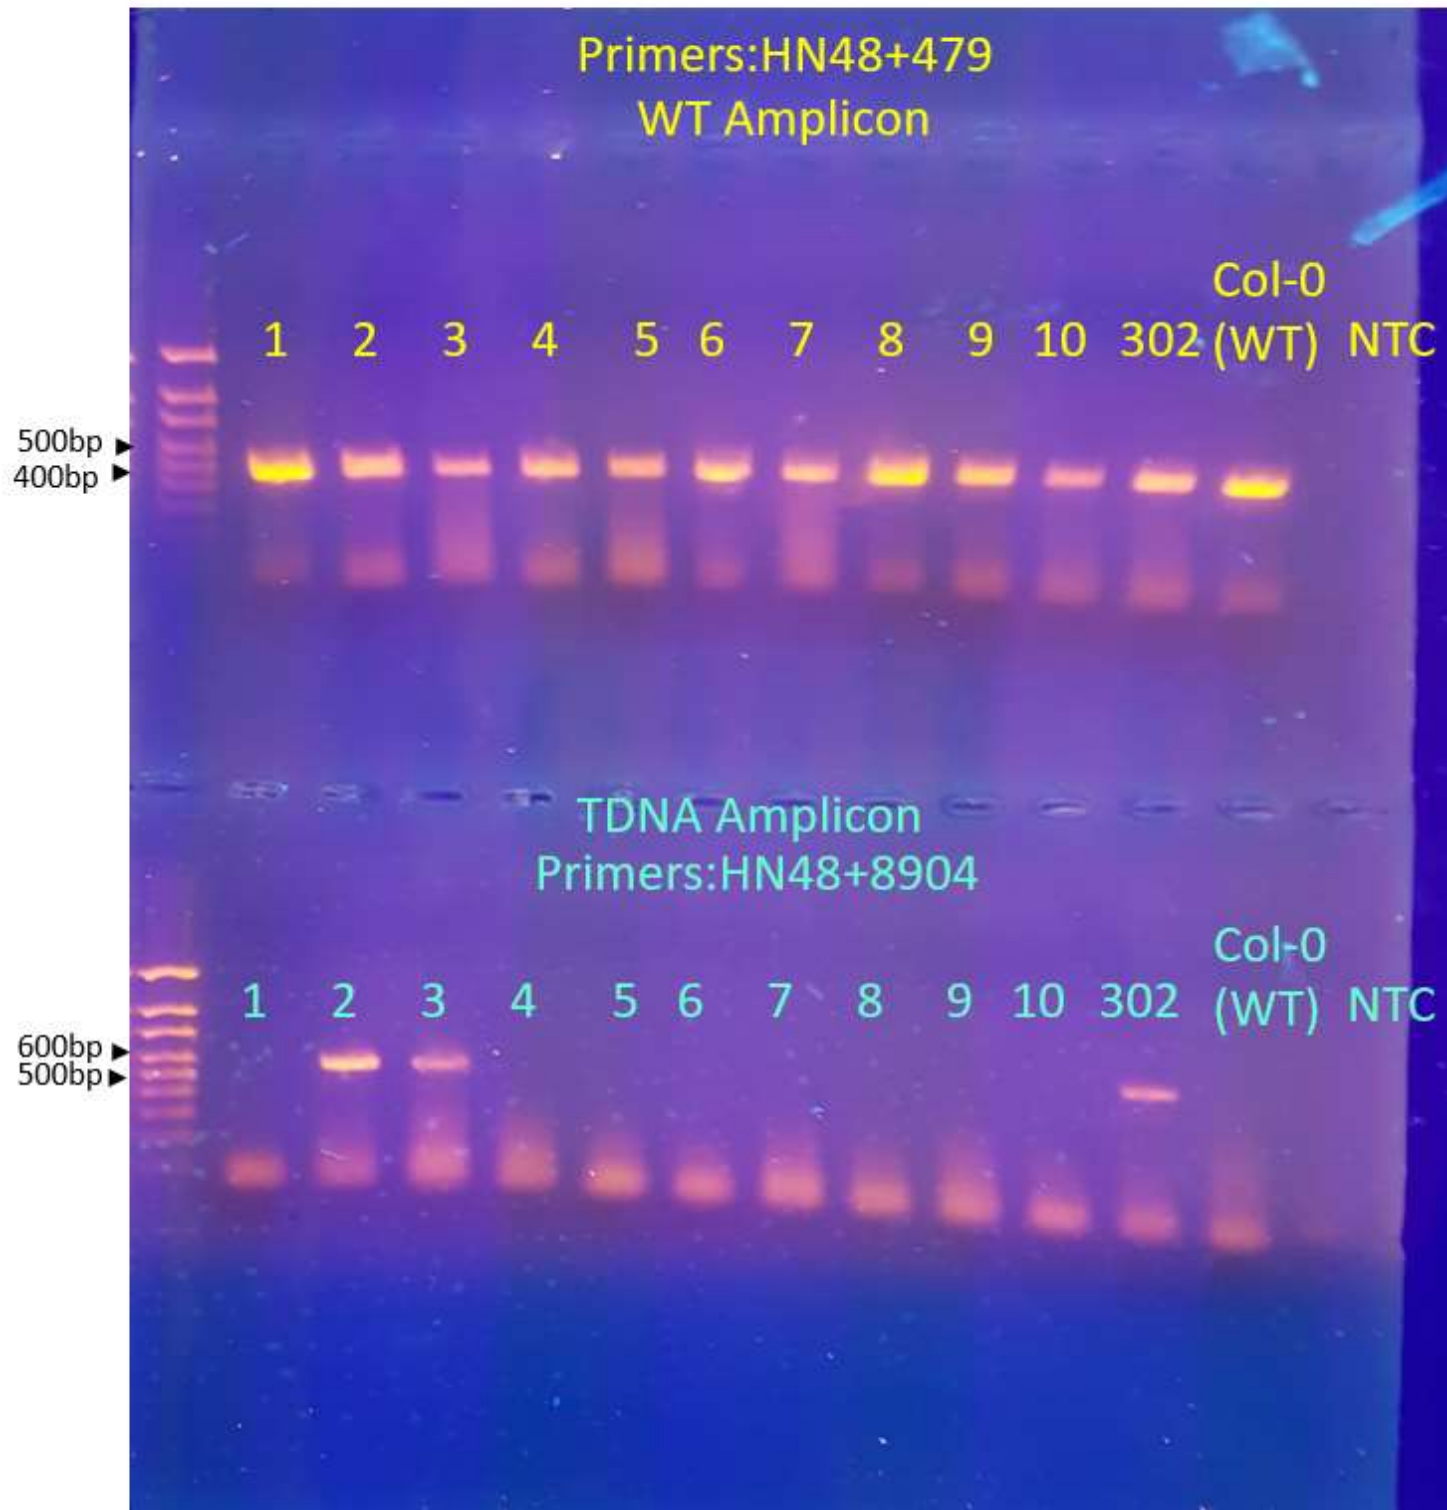

Figure S4: Gel images of GABI-Kat confirmation strategy for presence of T-DNA insertion in RBL7 gene in 10 progeny of self-crossed heterozygous *Arabidopsis thaliana* CS717302. Numbers 1–10 indicate individual progeny of the self-cross.

|                           |     |     |            |     |            |            |            |            |               |
|---------------------------|-----|-----|------------|-----|------------|------------|------------|------------|---------------|
| Arabidopsis<br>ABRC lines | 300 | 301 | 302        | 303 | 304        | 305        | 306        | 307        | Col-0<br>(WT) |
| RBL7 Genotype             | WT  | WT  | WT<br>TDNA | WT  | WT<br>TDNA | WT<br>TDNA | WT<br>TDNA | WT<br>TDNA | WT            |

Table S1: Summary of the GABI-Kat confirmation strategy and the genotype of the RBL7 gene for the Arabidopsis thaliana lines from ABRC (CS717300-307).

|                           |       |            |            |       |       |       |       |       |       |        |                 |               |
|---------------------------|-------|------------|------------|-------|-------|-------|-------|-------|-------|--------|-----------------|---------------|
| Arabidopsis<br>ABRC lines | 302-1 | 302-2      | 302-3      | 302-4 | 302-5 | 302-6 | 302-7 | 302-8 | 302-9 | 302-10 | 302<br>(hetero) | Col-0<br>(WT) |
| RBL7<br>Genotype          | WT    | WT<br>TDNA | WT<br>TDNA | WT     | WT<br>TDNA      | WT            |

Table S2: Summary of the GABI-Kat confirmation strategy and the genotype of the RBL7 gene for 10 progeny of self-crossed heterozygous *Arabidopsis thaliana* CS717302. Numbers 1–10 indicate individual progeny of the self-cross.
